# Supplementary material for: Synergistic recombination suppression by an inorganic layer and organic dye molecules in highly photostable quantum dot sensitized solar cells
Source: Royal Society of Chemistry journal article supplement (doi:10.1039/c3cp54954b), 2014-01-01
Supplement: c3cp54954b.pdf [file c3cp54954b.pdf]

# Synergistic Recombination Suppression by Inorganic Layer and Organic Dye Molecules in High Photostable Quantum Dot Sensitized Solar Cells

Heping Shen,<sup>a</sup> Jianbao Li,<sup>a</sup> Lin Zhao,<sup>b</sup> Wenli Wang,<sup>c, d</sup> Dan Oron<sup>e</sup> and Hong Lin,<sup>a, \*</sup>

<sup>a</sup> State Key Laboratory of New Ceramics & Fine Processing, School of Materials Science and Engineering, Tsinghua University, Beijing 100084, China

<sup>b</sup> Department of Physics, Hainan University, Tsinghua University, Beijing 100084, China.

<sup>c</sup> National Engineering Laboratory for Modern Silk (Suzhou), 215123 Suzhou, China

<sup>d</sup> College of Textile and Clothing Engineering of Soochow University, 215021 Suzhou, China

<sup>e</sup> Department of Physics of Complex Systems, Weizmann Institute of Science, Rehovot 76100, Israel.

\* Corresponding Author: [hong-lin@tsinghua.edu.cn](mailto:hong-lin@tsinghua.edu.cn);

**Fax: +86-10-62772672; Tel: +86-10-62772672.**

1. Electrochemical impedance spectroscopy (EIS)

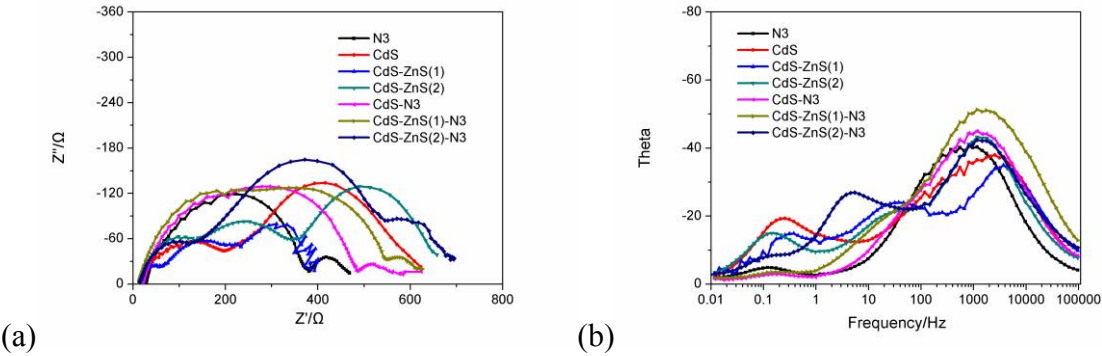

**Figure S1.** Typical electrochemical impedance spectra of cells in the forms of (a) Nyquist plots, (b) Bode plots. The spectra were measured with an external potential of -0.7V in the dark. ,
